# Supplementary material
Source: PubMed Central journal article supplement (PMC6643997)
Supplement: NIHMS1518459-supplement-1.pdf [file NIHMS1518459-supplement-1.pdf]

# Supplementary Figure S1

## A

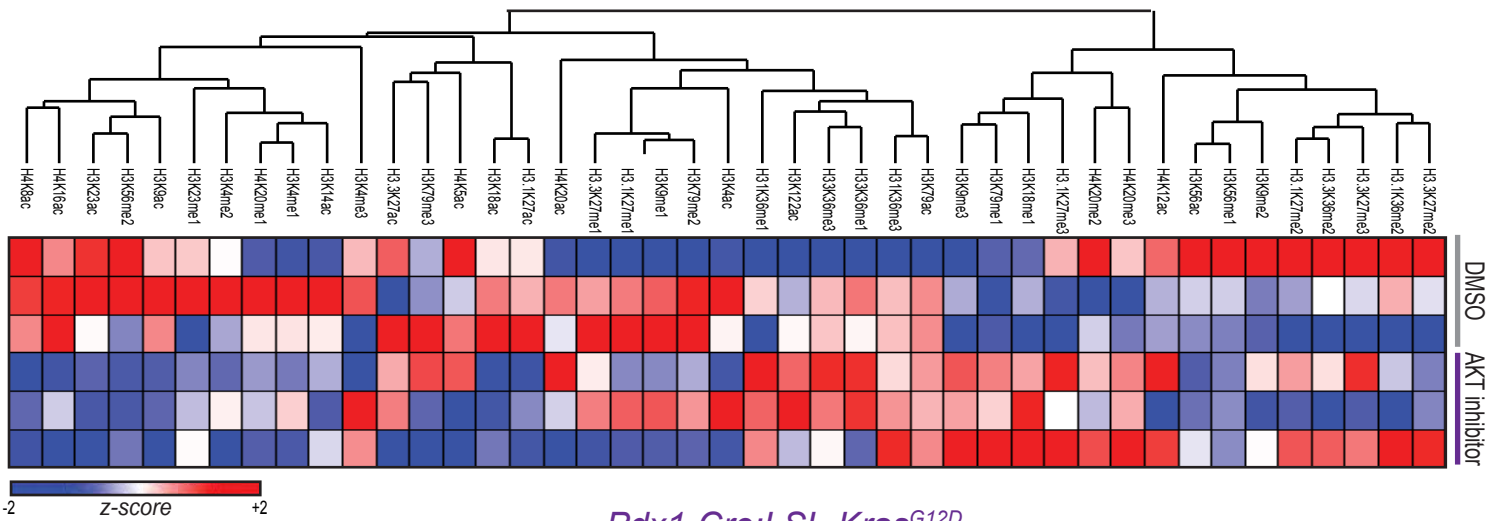

## B

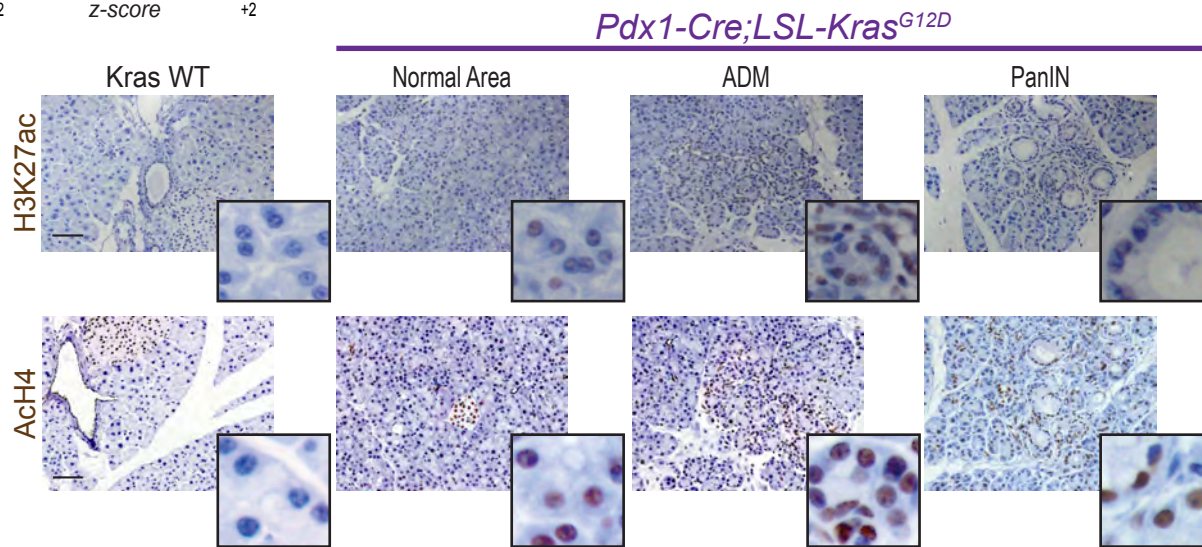

## C

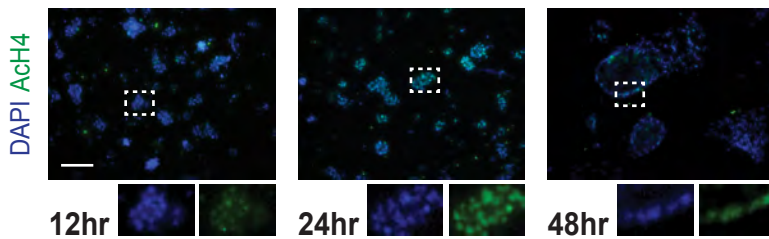

## D

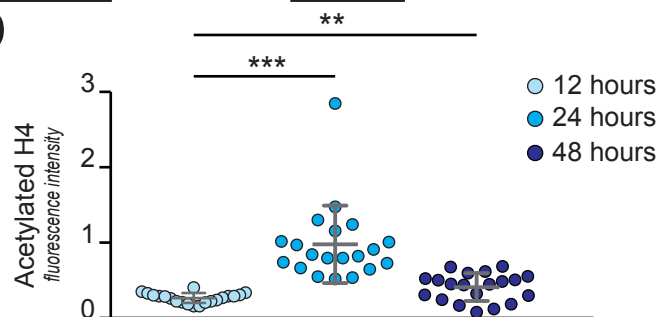

## E

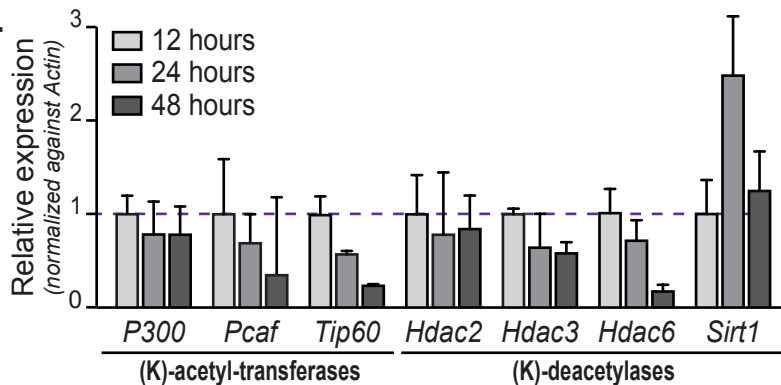

## F

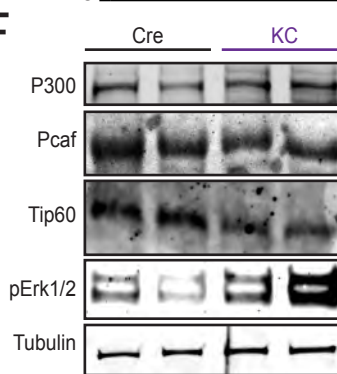

**Histone acetylation is responsive to AKT inhibition and increases during acinar-to-ductal metaplasia (ADM).** **A**, PanIN-derived pancreatic primary cells were treated with AKTi for 24 hours. Histone modifications were profiled by mass spectrometry. Heatmap shows regulation of detected histone marks. Rows show replicates ( $n=3$ , each treatment). **B**, Representative images of immunohistochemical staining against acetylated histones (H3K27ac, top panels; AchH4, bottom panels), nuclei counterstained with hematoxylin. Pancreata from either wild-type or  $Kras^{G12D}$ -expressing mice ( $n=2$ , each group) were harvested at different times (7 weeks of age,  $Kras^{WT}$  and  $Kras^{G12D}$  normal area; 4 months,  $Kras^{G12D}$  ADM and PanIN) and fixed in formalin. Pictures show representative images from normal regions or areas containing the indicated lesions. Scale bar, 100  $\mu$ m. **C**, Acinar cells were isolated from a 6-week-old KC mouse and embedded in Matrigel. At the indicated time, cell were fixed and subsequently stained for AchH4 (green) and counterstained with DAPI (blue). Bottom panels show individual channels. Scale bar, 100  $\mu$ m. Representative images from  $n=2$  biological replicates. **D**, quantification of C. Green fluorescence (AchH4) was quantified with ImageJ and normalized for relative blue fluorescence (DAPI). Each dot denotes an optical field ( $n=25$ , each time point). Error bars show mean  $\pm$  SD (\*\*,  $p<0.01$ ; \*\*\*,  $p<0.001$ ). **E**, mRNA expression of KATs and KDACs in acinar cells at same time points as in panel C ( $n=3$ , each time point). Bars show mean  $\pm$  SD. **F**, Western blotting of acinar cells isolated from wild-type (Cre) or KC mice ( $n=2$ , each group). For all panels: scale bar, 100  $\mu$ m.

# Supplementary Figure S2

A

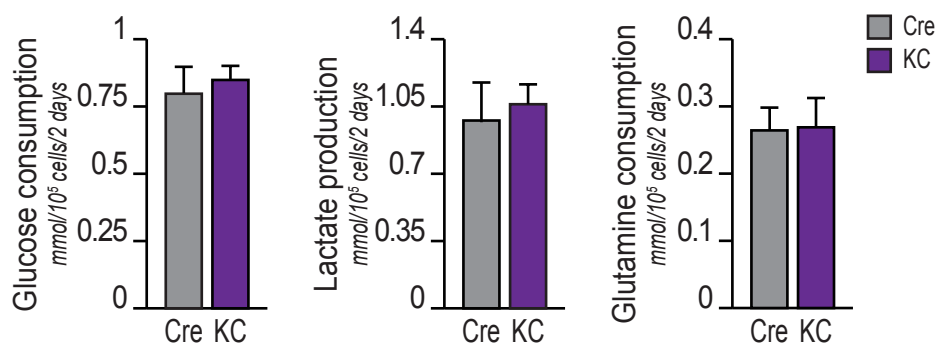

B

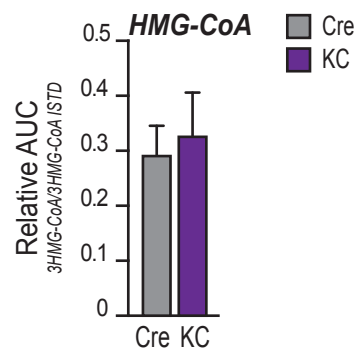

C

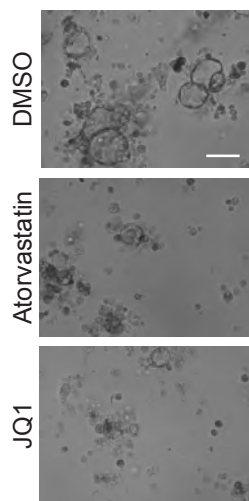

D

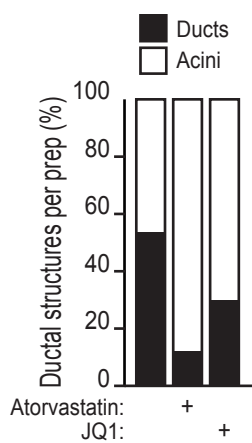

E

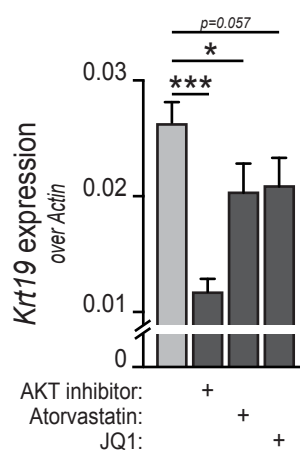

F

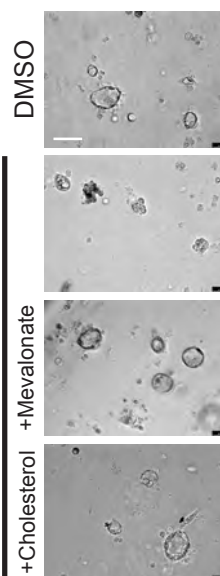

G

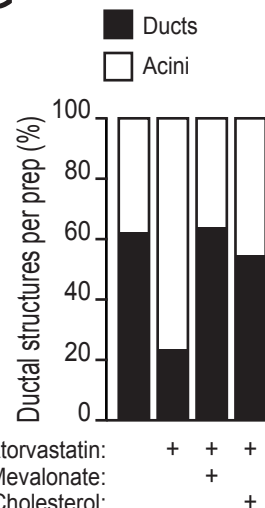

H

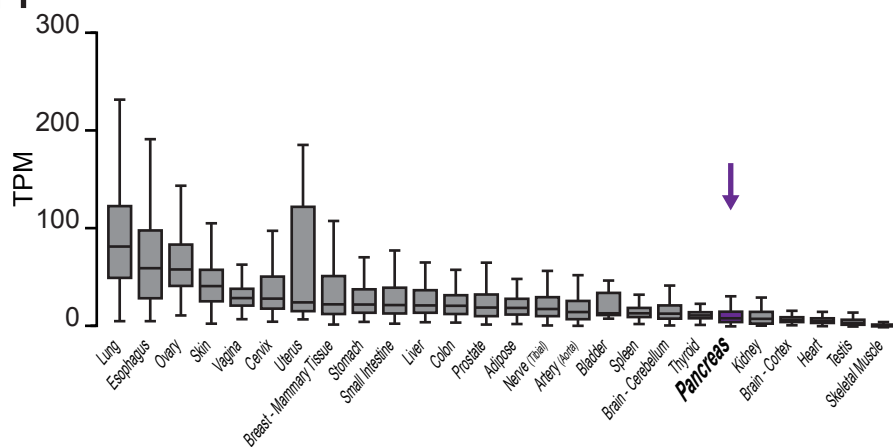

I

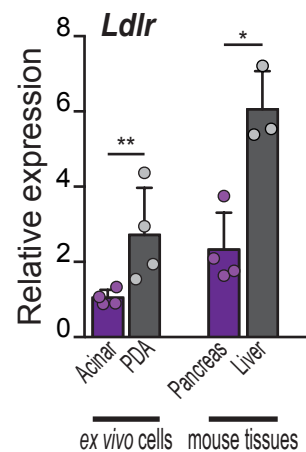

J

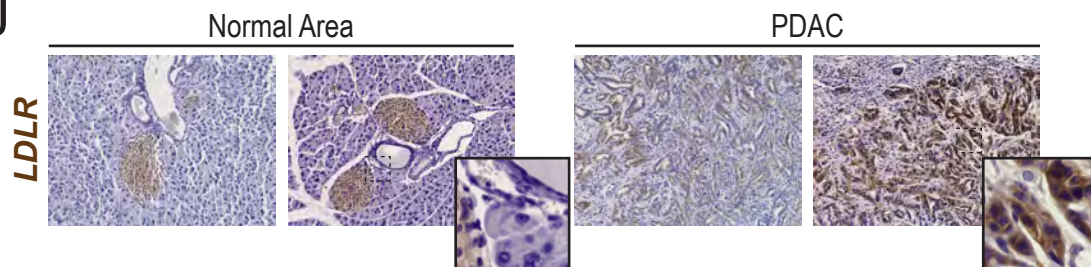

K

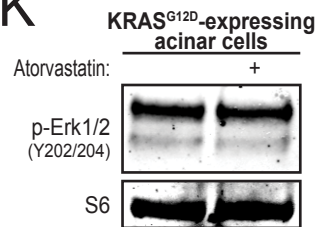

**KRAS<sup>G12D</sup> induces changes in acetyl-CoA metabolism.** In panels A-G, pancreatic acinar cells were harvested from 6-8-week-old wild-type (*Pdx1-Cre*; **Cre**) or (*Pdx1-Cre*; *Kras*<sup>G12D</sup>; **KC**) mice. Experimental replicates obtained from separate animals. **A**, Glucose and Glutamine consumption and lactate production in isolated acinar cells over 48 hours in culture ( $n=3$  mice, each group). **B**, LC-MS quantification of HMG-CoA in isolated acinar cells after 24 hours in culture ( $n=4$ , each group). **C**, morphology of matrigel-embedded KC acinar cells after 48 hours treatment with atorvastatin or JQ1 ( $n=3$  mice, each group). Scale bar, 100 μm. **D**, quantification of (C), blinded. **E**, *Krt19* mRNA quantification of cells in Figure 2C. **F**, matrigel-embedded KC acinar cells after 48 hours treatment with atorvastatin, +/- mevalonate or cholesterol ( $n=3$  mice, each group). Scale bar, 100 μm. **G**, quantification of (F), blinded. **H**, gene expression analysis of human healthy tissues, using publicly available datasets (GTex (29)). Tissues are listed according to mean level of expression and boxes show 75% CI, lines show median, minimum, maximum. Levels of expression in the pancreas are highlighted by a purple box. **I**, qPCR analysis of *Ldlr* gene expression (normalized over GAPDH), in isolated primary cells or whole mouse tissues. In purple, acinar cells or pancreata from WT animals. Dots denote individual animals. **J**, immunohistochemistry against LDLR, nuclei counterstained with hematoxylin. Pancreata from either wild-type (normal area) or *Kras*<sup>G12D</sup>-expressing (PDAC) mice ( $n=3$ , each group) were used. Magnifications show poor expression in non-malignant acinar cells and elevated positivity in cancer epithelial cells. **K**, Western blotting of isolated acinar cells after 24 hours in culture, +/- atorvastatin (20μM). For all panels, error bars show mean, +/- SD (\*,  $p<0.05$ ; \*\*,  $p<0.01$ ; \*\*\*,  $p<0.001$ ).

# Supplementary Figure S3

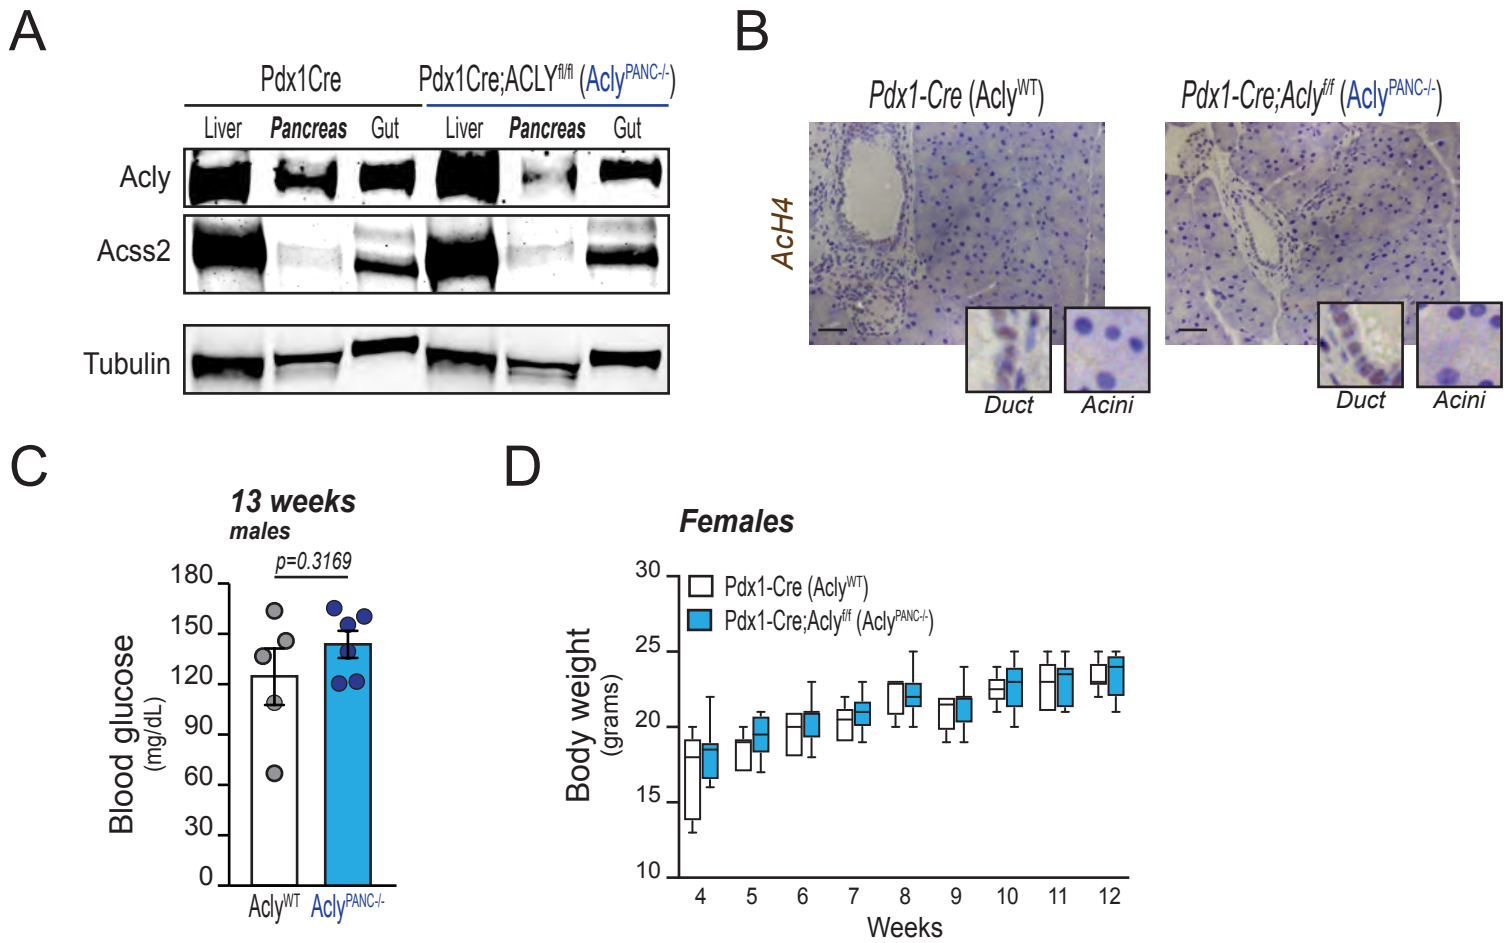

**Acly deletion from murine pancreas does not cause overt metabolic abnormalities.** **A**, Western Blotting of whole organ lysates from 8-week-old mice. **B**, Immunohistochemistry against AcH4. Scale bars, 50  $\mu$ m. **C**, blood glucose levels in overnight fasted animals. Each dot represents 1 mouse, mean  $\pm$  SEM. **D**, body weight over time in Acly<sup>WT</sup> and Acly<sup>PANC-/-</sup> female mice ( $n=5$ , each group). Boxes show 75% CI, lines show median, minimum, maximum. Not statistically significant (repeated measures ANOVA with *Tukey-Kramer* adjustment for multiple comparisons).



# Supplementary Figure S4

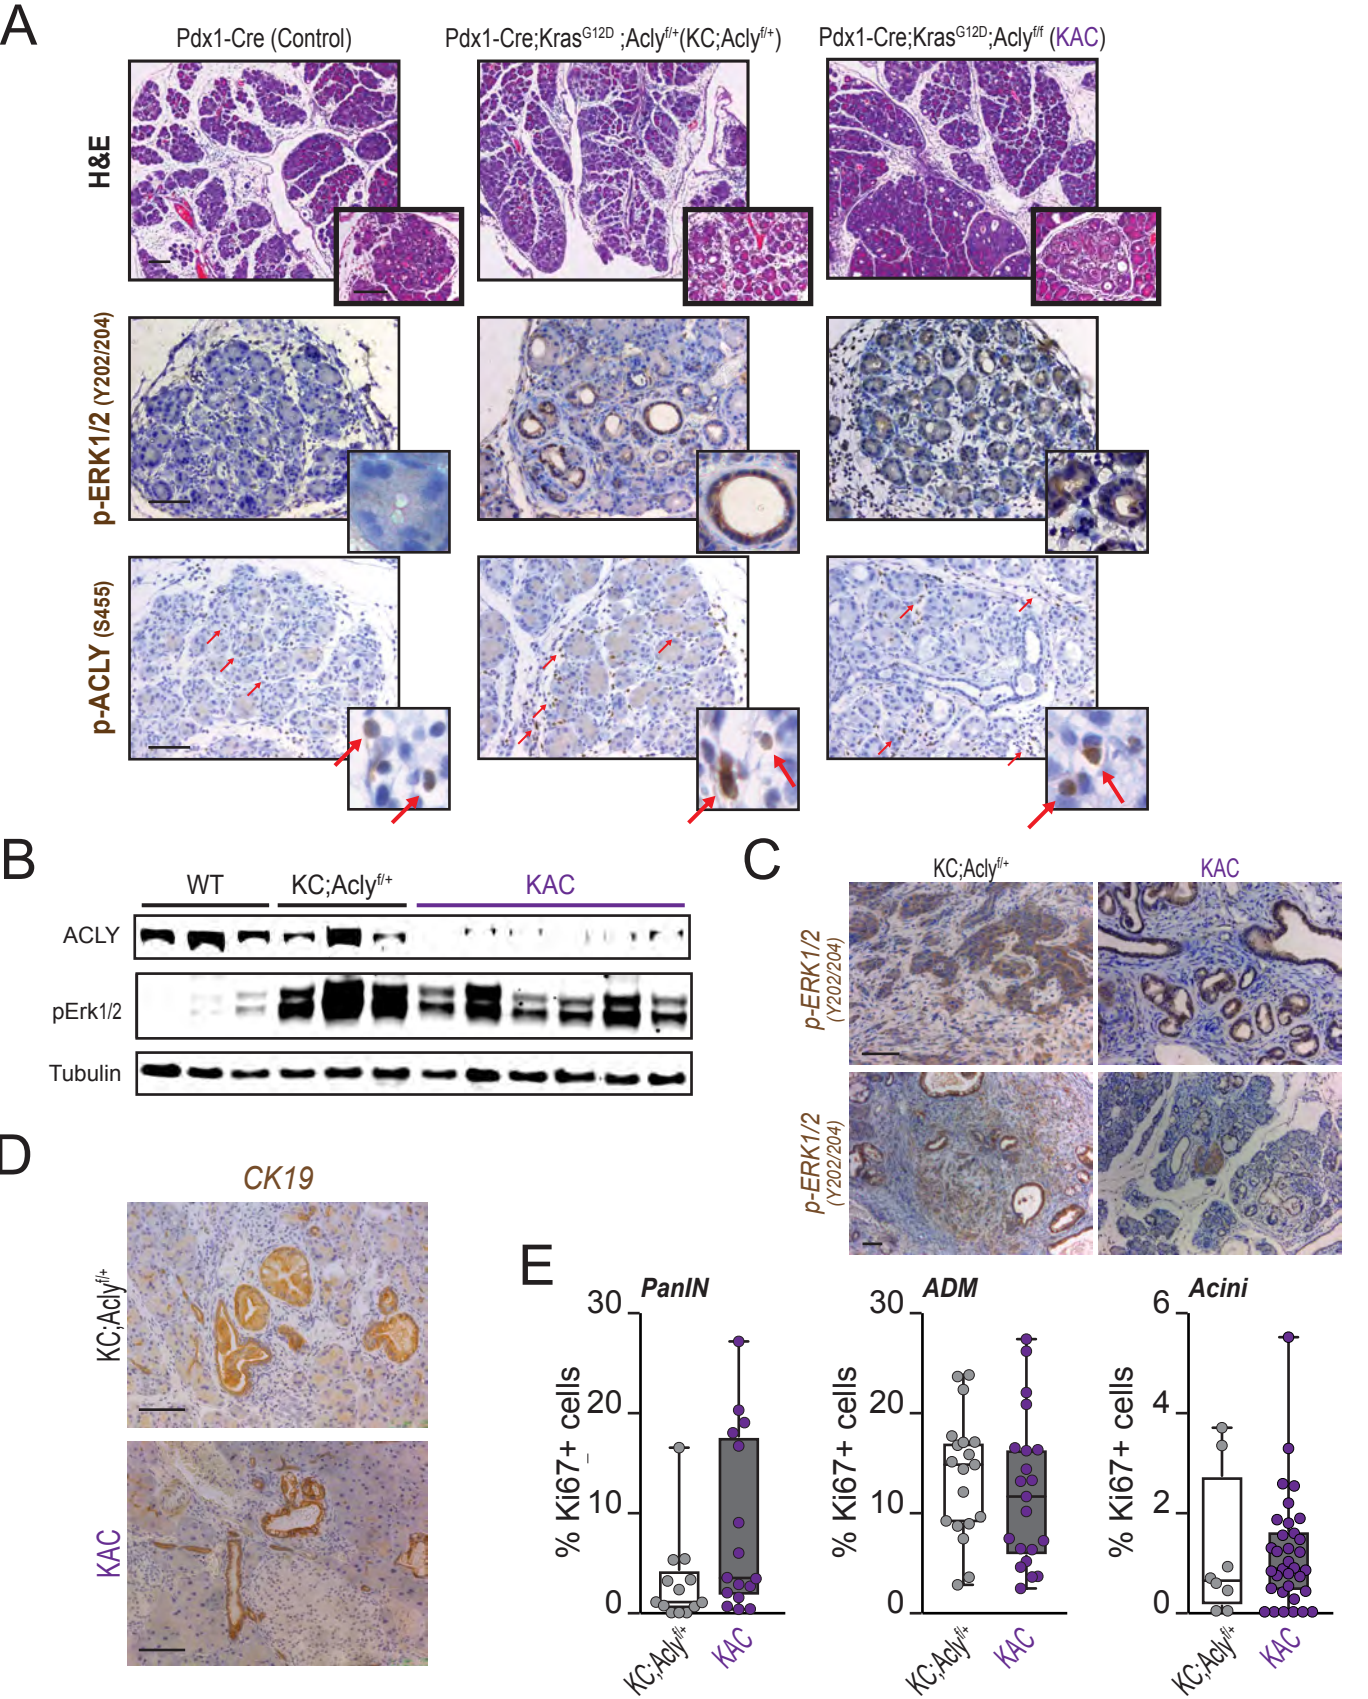

**Acly deletion inhibits acinar-to-ductal metaplasia and impairs tumor formation.** **A**, Mice were treated with cerulein as illustrated in Figure 4F. Figure shows histological characterization of pancreata at Day 3, acute phase. Representative images for H&E staining and immunohistochemistry against p-ERK1/2(Y202/Y204) and p-ACLY(S455) are shown. Insets show magnifications. Red arrows indicate infiltrating cells (p-ACLY positive). **B**, Western Blotting of whole organ lysates from Day 21 Cre (WT), KC;Acly<sup>f/f</sup> or KAC mice. **C**, Immunohistochemistry against p-ERK1/2(Y202/Y204) in Day 21 pancreata. Two magnifications. For immunohistochemistry, nuclei were counterstained with hematoxylin. **D**, Immunohistochemistry against Cytokeratin-19 (CK19) in Day 21 pancreata. **E**, Immunohistochemistry against Ki67 (proliferation marker): quantifications. Ki67+ nuclei were counted in PanIN lesions, ADM foci, or normal acinar cells. 5 randomly selected optical fields per mouse section were evaluated. Optical fields with fewer than 75 acinar cells or 20 ADM cells or 20 PanIN cells were excluded from the analysis. Each dot represents an optical field. Boxes show 75% CI, lines show median, minimum, maximum. For all panels, scale bar, 100  $\mu$ m.

# Supplementary Figure S5

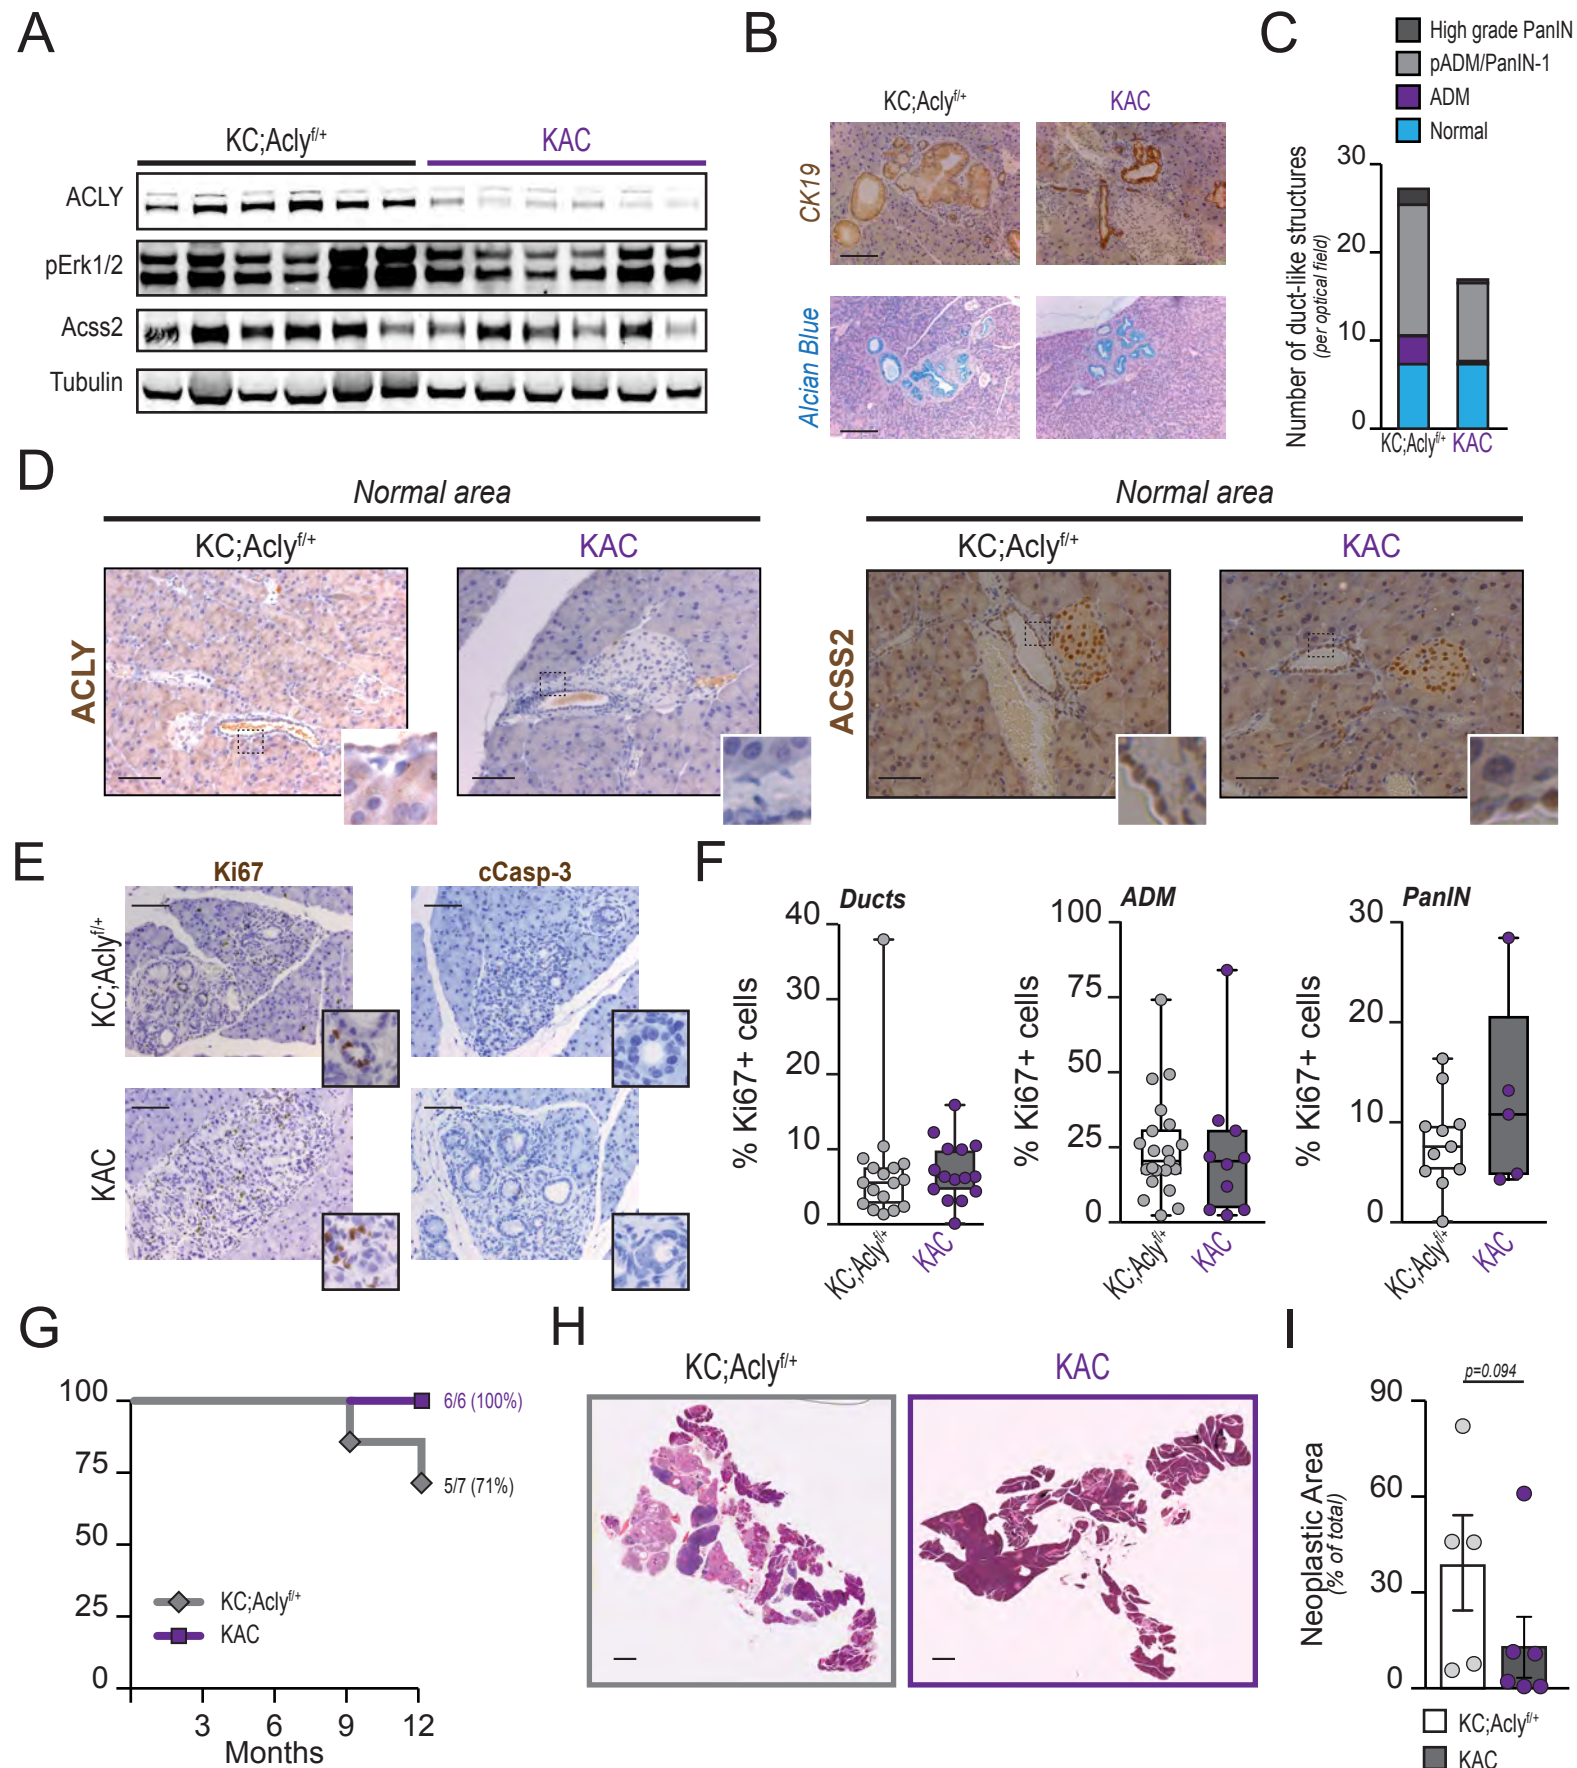

**Pancreatic tumorigenesis is impaired in the absence of ACLY.** Figure shows *Pdx1-Cre;Kras<sup>G12D</sup>;Aclly<sup>fl/+</sup>* (KC;Aclly<sup>fl/+</sup>) or *Pdx1-Cre;Kras<sup>G12D</sup>;Aclly<sup>fl/fl</sup>* (KAC). **A-F**, 4-month-old mice ( $n=7$ , each genotype). **G-I**, 1-year-old mice ( $n=5$  KC;Aclly<sup>fl/+</sup>;  $n=6$  KAC mice).

**A**, Western Blotting of whole pancreas lysates. **B**, staining of PanIN lesions using immunohistochemistry against CK19 (upper panels) or the acidic chemical dye Alcian Blue (bottom panels). Scale bar 100  $\mu$ M. **C**, Lesions were blindly scored by a vet pathologist. 10 high-power optical fields per mouse section were analyzed. Normal: normal, non-malignant duct; ADM: acinar-to-ductal metaplasia; pADM: polymorphic ADM; PanIN-1: pancreatic intra-epithelial neoplastic lesion type 1A or 1B; High grade PanIN: PanIN-2 or PanIN-3. **D**, immunohistochemistry against ACLY and ACSS2. Pictures show representative normal areas (not containing neoplastic ductal formations). Magnification shows duct and acinar cell nuclei. Scale bar, 50  $\mu$ m. **E**, immunohistochemistry against Ki67 and cleaved Caspase-3 (cCasp-3). Nuclei counterstained with hematoxylin. Scale bar 100  $\mu$ m. **F**, percent of Ki67+ nuclei in ducts, ADM foci and PanIN lesions. 5 randomly selected optical fields per mouse section were evaluated. Optical fields with fewer than 75 acinar cells or 20 ADM cells or 20 PanIN cells were excluded from the analysis. Each dot represents an optical field. Boxes show 75% CI, lines show median, minimum, maximum. **G**, Kaplan-Meier Survival to 1 year of age. **H**, hematoxylin and eosin (H&E) staining of 1-year-old KC;Aclly<sup>fl/+</sup> or KAC mice, transverse section of whole pancreas. Scale bar, 1 mm. **I**, Each lesion's area and whole organ surface were measured in ImageJ. Lesions areas were summed and denoted as "neoplastic area". Percent of neoplastic area over total pancreas surface is shown. Each dot represents an animal. Bars show mean  $\pm$  SD.



# Supplementary Figure S6

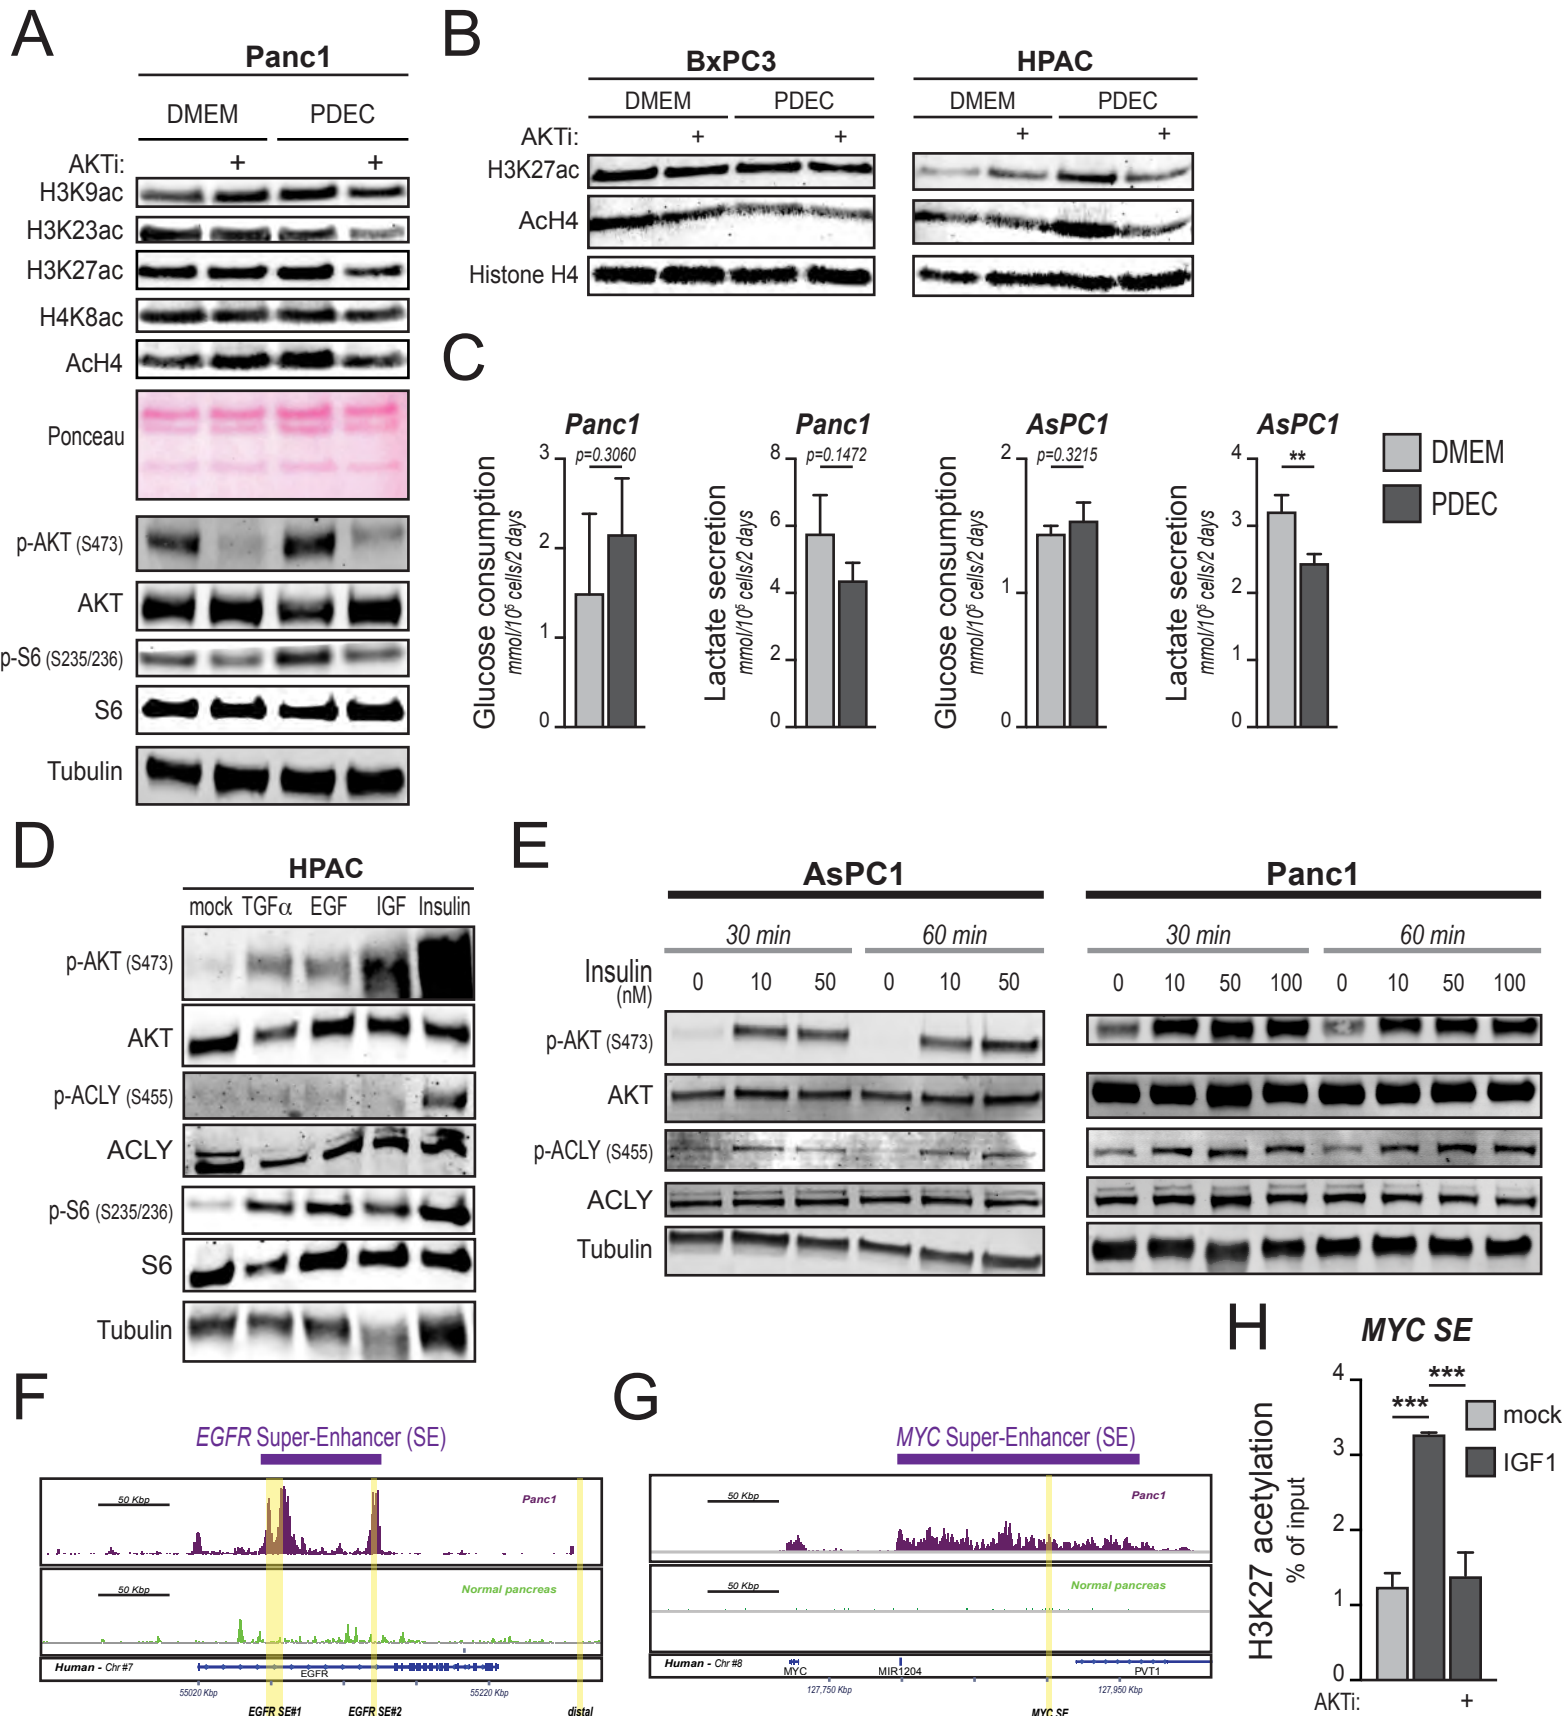

**Environmental stimuli induce AKT-ACLY signaling and histone acetylation.** **A**, Western blots of signaling and acid-extracted histones from Panc1 cells cultured in two different tissue culture media (DMEM or PDEC), +/- AKTi for 24 hours. Ponceau staining and tubulin are shown as loading controls for histones and signaling, respectively. **B**, BxPC3 and HPAC cells treated as in A. **C**, Glucose consumption, lactate production in indicated cell lines cultivated for 48 hours in either DMEM or PDEC medium. **D**, HPAC cells were serum-starved overnight, treated with indicated growth factors for 1 hour, and analyzed by western blot. **E**, AsPC1 and Panc1 cells treated with increasing doses of insulin for either 30 minutes or 1 hour. **F-G**, map of *EGFR* super-enhancer (F) or *MYC* super-enhancer (G) (labeled, purple dash). Tracks show H3K27ac profile of the *EGFR* and *MYC* loci, from publically-available ChIP-Seq data. Purple, Panc1 cells (ENCODE accession #: ENCBS729QZR). Green, normal human pancreas (ENCODE accession #: ENCSR612BWE). Structures and locations of the human genes present in the two loci are shown in blue. Locations of primer sets used are indicated. **H**, H3K27ac ChIP-QPCR of the *MYC* super-enhancer (SE). Bar graphs represent mean +/- SD, \*\*,  $p < 0.01$ ; \*\*\*,  $p < 0.0001$ .

# Supplementary Figure S7

A

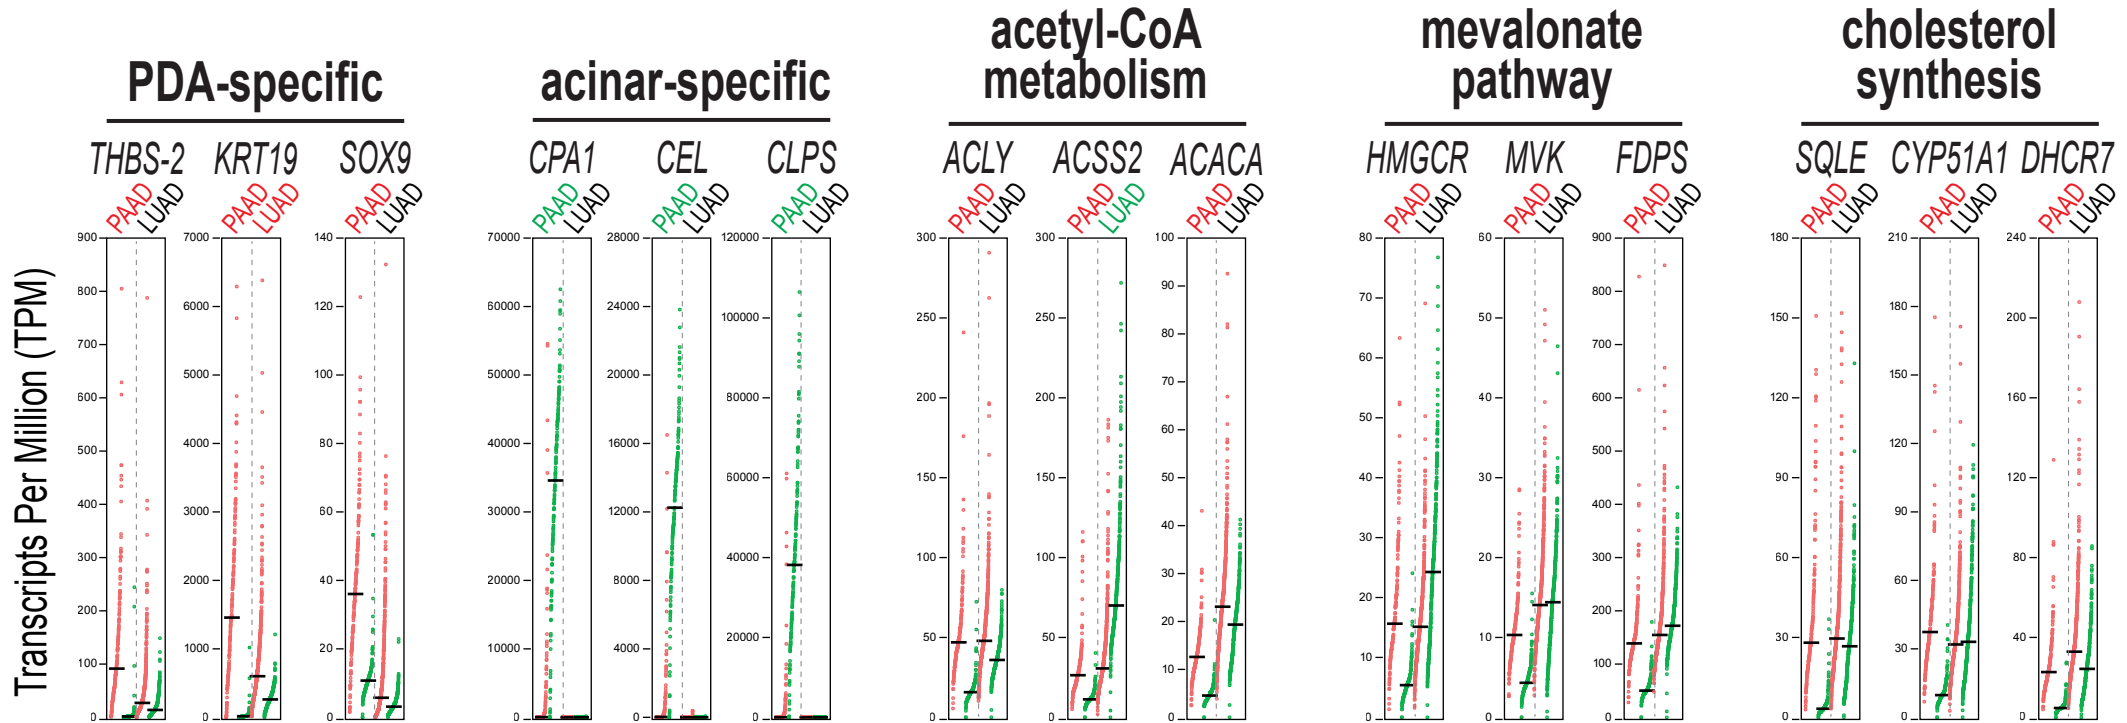

- Normal tissues
- Tumors

**PAAD:** Pancreatic ductal adeno carcinoma  
**LUAD:** Lung adeno carcinoma

● statistically upregulated  
 ● statistically downregulated  
 ● not significant

**Genes encoding enzymes in acetyl-CoA metabolism and sterol synthesis are elevated in human PDA samples.** A, gene expression analysis of human samples, using a public databases (GEPID (36), see *Methods*). Expression in healthy tissues (green dots, data from GTEx consortium) or tumor tissues (red dots, data from TCGA consortium) was compared for PDA tumors (PAAD; compared to pancreatic tissues in GTEx) and lung adeno-carcinoma (LUAD; compared to healthy lung tissues in GTEx). Each dot represents a patient/donor (n=179 PDA tumors; n=171 normal pancreas; n=483 lung tumors; n=346 normal lung). Colors denote statistical significance: red marks upregulation in tumors, green marks downregulation (ANOVA;  $p < 0.05$ ).

# Supplementary Table 1

Primers used in the manuscript

| <b>Primer Set</b>       | <b>Sequence</b>                |
|-------------------------|--------------------------------|
| <i>Mouse Genotyping</i> |                                |
| Cre-Fw                  | TGCCACGACCAAGTGACAGC           |
| Cre-Rv                  | CCAGGTTACGGATATAGTTCATG        |
| Acly_WT-Fw              | TGCAATGCTGCCTCCAATGAT          |
| Acly_WT-Rv              | GGAGCCAGAGGAGAAAAAGGC          |
| p53-Fw                  | AGCACATAGGAGGCAGAGAC           |
| p53-Rv                  | CACAAAAACAGGTTAAACCCAG         |
| tm1c (flox) -Fw         | aaggcgcataacgataccac           |
| tm1c (flox) -Rv         | ccgcctactgcgactatagaga         |
| Kras-WT                 | TGT CTT TCC CCA GCA CAG T      |
| Kras-Common             | CTG CAT AGT ACG CTA TAC CCT GT |
| Kras-mutant             | GCA GGT CGA GGG ACC TAA TA     |

## Gene expression (mouse)

|                |                               |
|----------------|-------------------------------|
| Hk2-Fw         | TGA TCG CCT GCT TAT TCA CGG   |
| Hk2-Rv         | AAC CGC CTA GAA ATC TCC AGA   |
| Hk1-Fw         | GCACGA TGTTCTCTGGGGTG         |
| Hk1-Rv         | CGTCAAGA TGCTGCCAACCT         |
| Pfk1-Fw        | TGACATGACCATTGGCACAG          |
| Pfk1-Rv        | TCTTGCTACTCAGGATTCCGG         |
| Rpia-Fw        | TGCAGCGAATAGCTGAAAGA          |
| Rpia-Rv        | ACAGCCATTTCGAAGTTCCAC         |
| Rpe-Fw         | GGGGAATGGGATGAAGGTT           |
| Rpe-Rv         | GCACTGCCAGACACAATCAT          |
| Dgat1-Fw       | TGCTACGACGAGTTCTTGAG          |
| Dgat1-Rv       | CTCTGCCACAGCATTGAGAC          |
| Slc7a5/Lat1-Fw | ATG GAG TGT GGC ATT GGC TT    |
| Slc7a5/Lat1-Rv | TGC ATC AAC TTC TGG CAG AGC A |
| Bcat1-Fw       | GATAATGGGTGTCAGCAGGTC         |
| Bcat1-Rv       | GGAGGAGTTGCCAGTTCTTCT         |
| Pdha-Fw        | GACTCAGGGTAGATGGAATGG         |
| Pdha-Rv        | CTTACGCTGGATGGGAACAC          |



|            |                          |
|------------|--------------------------|
| Cs-Fw      | GAACAGGTGTCTTGGCTCTC     |
| Cs-Rv      | CCTCATGGTCACTATGGATGG    |
| ldh1-Fw    | GCTGCTTCCAGTACTCTATCC    |
| ldh2-Rv    | GTGCAAACCTGATAAGGTCC     |
| Ldha-Fw    | CTCCAGCAAAGACTACTGTG     |
| Ldha-Rv    | TGGGTAAAGAGACTTCAGGG     |
| Glut1-Fw   | TGTGGTGTGCGCTGTTTGTGT    |
| Glut1-Rv   | CCTCGGGTGTCTTGTCACTT     |
| Psat1-Fw   | CAGTGGAGCGCCAGAATAGAA    |
| Psat1-Rv   | CCTGTGCCCTTCAAGGAG       |
| Gcnt3-Fw   | CCTTTGGGCCACCCTCC        |
| Gcnt3-Rv   | CAAATTTTCGATGCAAGGGATC   |
| P300-Fw    | ggagcaagctaatggggaagtgag |
| P300-Rv    | ccccagcattttgagaggaagac  |
| PCAF-Fw    | CCGTGTCATTGGTGGTATCTGTT  |
| PCAF-Rv    | AGGAAGTTGAGGATCTCGTGCTT  |
| mActin-Fw  | TGGTGGGAATGGGTCAGAA      |
| mActin-Rv  | TCTCCATGTGCGTCCCAGTTG    |
| Gcn5-Fw    | TGAGCAGGTCAAGGGTTATG     |
| Gcn5-Rv    | CGTAGGTGAGGAAGTAGAGAATG  |
| Tip60-Fw   | GTGAAACGGAAGGTGGAGGT     |
| Tip60-Rv   | CCAGTCATTGCGTGGTGCTGA    |
| mSirt1-Fw  | GGGAACCTTTGCCTCATCTA     |
| mSirt1-Rv  | TACTGGAACCAACAGCCTTA     |
| mHDAC1-Fw  | TTGCTCGCTGCTGGACTTAC     |
| mHDAC1-Rv  | TGGCTTCTCCTCCTTGGTTT     |
| mHDAC2-Fw  | GGACAGGCTTGGTTGTTTCA     |
| mHDAC2-Rv  | ATTCTACGACCTCCTTCAC      |
| mHDAC3-Fw  | CCGAAATGTTGCCCGGTGTT     |
| mHDAC3-Rv  | GGGTGCTTCTGGCCTGCTGT     |
| mHDAC6-Fw  | AACCGCACTGGGCTGGTCTA     |
| mHDAC6-Rv  | TCAAAGTTGGCACCTTCACG     |
| 18S-Fw     | TCAACACGGGAAACCTCACC     |
| 18S-Rv     | CCACCCACGGAATCGAGAAA     |
| mKrt19-Fw  | TCCCAGCTCAGCATGAAAGCT    |
| mKrt19-Rv  | AAAACCGCTGATCACGCTCTG    |
| mACC1_Fw   | ACAGTGGAGCTAGAATTGGAC    |
| mACC1_Rv   | ACTTCCCGACCAAGGACTTTG    |
| mMvk_Fw    | GCATCACCTCCTGAAGC        |
| mMvk_Rv    | CTGGTCTCCCAGCAGTCAA      |
| mFdps_Fw   | GGAGGTCCTAGAGTACAATGCC   |
| mFdps_Rv   | AAGCCTGGAGCAGTTCTACAC    |
| mHmgcs1_Fw | GGTCTGATCCCCTTTGGTG      |

|            |                        |
|------------|------------------------|
| mHmgcs1_Rv | TGTGAAGGACAGAGAACTGTGG |
| mHmgcr_Fw  | CGTAAGCGCAGTTCCTTCC    |
| mHmgcr_Rv  | TTGTAGCCTCACAGTCCTTGG  |
| mDgat1_Fw  | TGCTACGACGAGTTCTTGAG   |
| mDgat1_Rv  | CTCTGCCACAGCATTGAGAC   |
| mAcly-Fw   | TTCGTCAAACAGCACTTCC    |
| mAcly-Rv   | ATTTGGCTTCTTGGAGGTG    |
| mAcss2-Fw  | GCTTCTTTCCATTCTTCGGT   |
| mAcss2-Rv  | CCCGGACTCATTCAAGGATTG  |
| mFasn-Fw   | ATTGGTGGTGTGGACATGGTC  |
| mFasn-Rv   | CCCAGCCTTCCATCTCCTG    |
| mScd1-Fw   | AGAGTCAGGAGGGCAGGTTT   |
| mScd1-Rv   | CTGGAGATCTCTTGGAGCATGT |
| mGAPDH-Fw  | TCCTTTAGGATTTGGCCGT    |
| mGAPDH-Rv  | TTGATGGCAACAATCTCCAC   |
| mG6pd-Fw   | CCGGAAACTGGCTGTGCGCT   |
| mG6pd-Rv   | CCAGGTCACCCGATGCACCC   |
| mGfpt1-Fw  | ATGCAAGTGCCGTGATAG     |
| mGfpt1-Rv  | TCGTTTAATTCGGTGGATAGAG |
| mMgat5-Fw  | CTGGACTGTGGATCTCAATAAC |
| mMgat5-Rv  | ATGGCATATACGGCTCAATC   |
| mCpa1-Fw   | TCGATCACACACCGAGGGCT   |
| mCpa1-Rv   | GGGCATCCCAAAGGCAGCAT   |
| mAmy2-Fw   | CCTCATTGGGTTCTGCTGGGC  |
| mAmy2-Rv   | CGCCACTCGAACAGGTGGAC   |

Chromatin immuno precipitation (human)

|                     |                      |
|---------------------|----------------------|
| EGFR#SE-065k-Fw     | CAGAGCTGAAGGCAAGGGGA |
| EGFR#SE-065k-Rv     | GGAGGCCTTCTCCAGGGTTC |
| EGFR#SE-075k-Fw     | CCCAGACCATCAGTGGGCAG |
| EGFR#SE-075k-Rv     | GGTGTGGAGGAAGCTGGAGG |
| EGFR#SE-131k-Fw     | CTGGCTGCATCGTTCTGCTG |
| EGFR#SE-131k-Rv     | CTCGCATGGTGTGCTTTCAG |
| EGFR#distal-217k-Fw | GAGGAGCCCTGAGTGGAAGC |
| EGFR#distal-217k-Rv | ACACCACTGTGTCAGCCACT |
| MYC#SE-Fw           | TCCGGCAACACGTTCCCTTT |
| MYC#SE-Rv           | AACACTCAACAGGCCAGCCC |
| LIF promoter-Fw     | CCCTGCTGACCACTGTACCT |
| LIF promoter-Rv     | TGAGTCAGTCACCCCTACCC |
| UPP1 promoter-Fw    | TAGCTGCGACTCGAAGTGAA |
| UPP1 promoter-Rv    | ACCTTCTGATCCTGGGAGT  |

CXCL1 promoter-Fw  
CXCL1 promoter-Rv  
TUBA1A -Fw  
TUBA1A -Rv

TATACAGCCCTGGCTTCCAC  
CTGCTTGTTCCCTTGTGTTGC  
CGA AAT GGC CTG GGT ATA TG  
CTG CAG AAG AAG CTC TGAAA
